# Supplementary material
Source: PubMed Central journal article supplement (PMC4090303)
Supplement: NIHMS545747-supplement-01.pdf [file NIHMS545747-supplement-01.pdf]

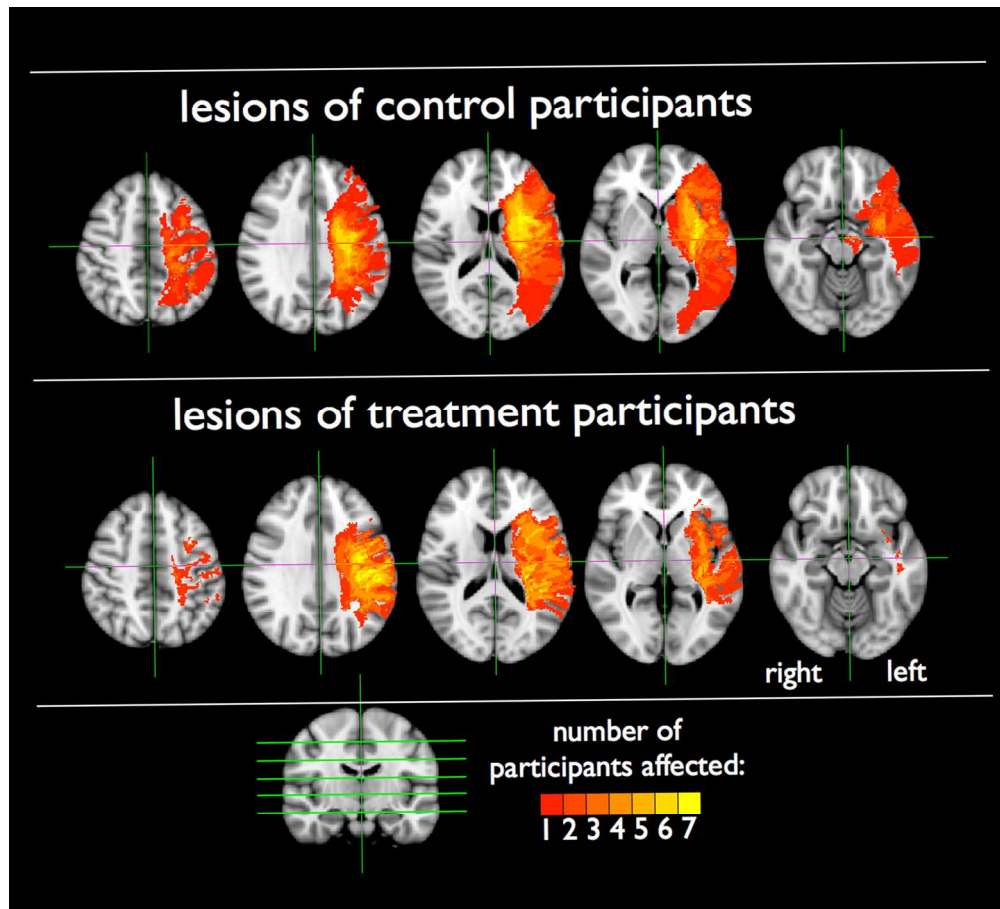

Supplementary Figure 1. Lesion Location. Color-coded images (bar code in lower portion) indicate how many patients in each group had lesions in different voxels.  
172x156mm (600 x 600 DPI)
